# Supplementary material for: Cholesterol Efflux and Collateral Circulation in Chronic Total Coronary Occlusion: Effect‐Circ Study
Source: PubMed Central journal article supplement — J Am Heart Assoc. 2021 Feb 26;10(5):e019060. doi: 10.1161/JAHA.120.019060 (PMC8174259; doi:10.1161/jaha.120.019060), 2021-02-26
Supplement: JAH3-10-e019060-s001.pdf [file JAH3-10-e019060-s001.pdf]

# **SUPPLEMENTAL MATERIAL**

**Table S1. Predictors of good CCC in subgroups classified by sex and acute coronary syndrome.**

|                         | Males (n=163)       |       | Females (n=63)      |       | Acute coronary syndrome (n=165) |       | No acute coronary syndrome (n=61) |       |
|-------------------------|---------------------|-------|---------------------|-------|---------------------------------|-------|-----------------------------------|-------|
|                         | Odds ratio (95% CI) | p     | Odds ratio (95% CI) | p     | Odds ratio (95% CI)             | p     | Odds ratio (95% CI)               | p     |
| Age                     | 0.98 (0.94, 1.01)   | 0.15  | 0.84 (0.74, 0.94)   | 0.004 | 0.98 (0.94, 1.01)               | 0.16  | 0.75 (0.62, 0.91)                 | 0.003 |
| Male sex                | --                  | --    | --                  | --    | 0.83 (0.37, 1.85)               | 0.65  | 0.11 (0.01, 0.86)                 | 0.035 |
| Diabetes mellitus       | 0.62 (0.28, 1.38)   | 0.25  | 0.92 (0.19, 4.39)   | 0.92  | 0.73 (0.34, 1.59)               | 0.43  | 0.86 (0.12, 5.92)                 | 0.88  |
| Acute coronary syndrome | 0.66 (0.27, 1.61)   | 0.36  | 0.43 (0.09, 2.07)   | 0.30  | --                              | --    | --                                | --    |
| HDL-C                   | 1.01 (0.98, 1.03)   | 0.63  | 0.99 (0.94, 1.05)   | 0.83  | 1.00 (0.98, 1.02)               | 0.76  | 0.94 (0.86, 1.03)                 | 0.20  |
| Gensini score           | 1.00 (0.99, 1.01)   | 0.56  | 1.01 (0.99, 1.04)   | 0.30  | 1.00 (0.99, 1.01)               | 0.36  | 0.99 (0.96, 1.03)                 | 0.58  |
| CEC                     | 1.09 (1.01, 1.18)   | 0.025 | 1.09 (0.93, 1.27)   | 0.28  | 1.08 (1.00, 1.16)               | 0.044 | 1.26 (1.03, 1.55)                 | 0.028 |

CCC: coronary collateral circulation; CI: confidence interval, HDL: high-density lipoprotein-cholesterol, CEC: cholesterol efflux capacity
